# Supplementary material for: Automatic Classification Approach for Detecting COVID-19 using Deep Convolutional Neural Networks
Source: Preprints.org preprint supplement (doi:10.20944/preprints202009.0524.v1), 2020-09-23
Supplement: Supplementary file 1 [file supplementary]

# Automatic Classification Approach for Detecting COVID-19 using Deep Convolutional Neural Networks

Sajib Sarker <sup>1,†</sup>, Ling Tan <sup>1,†</sup>, Ma Wen Jie <sup>1</sup>, Rong Shan Shan <sup>1</sup>, Md. Arfan Ali <sup>2,†</sup>, Muhammad Bilal <sup>2,\*</sup>, Zhongfeng Qiu <sup>2</sup>, Sanjit Kumar Mondal <sup>3</sup> and Pravash Tiwari <sup>4</sup>

<sup>1</sup> School of Computer and Software, Nanjing University of Information Science & Technology, Nanjing 210044, China; sajibsarker@nuist.edu.cn

<sup>2</sup> School of Marine Sciences, Nanjing University of Information Science & Technology, Nanjing 210044, China, md.arfanali@nuist.edu.cn; zhongfeng.qiu@nuist.edu.cn

<sup>3</sup> Collaborative Innovation Center on Forecast and Evaluation of Meteorological Disaster, Institute for Disaster Risk Management, School of Geographical Science, Nanjing University of Information Science and Technology, 219 Ningliulu, Nanjing 210044, China; 20185111002@nuist.edu.cn

<sup>4</sup> House no. 71, Galkopakha, Kathmandu, Nepal; pravashtiwari@geop@hotmail.com

\* Correspondence: muhammad.bilal@connect.polyu.hk

† These authors contributed equally to this work.

## Supplementary Materials

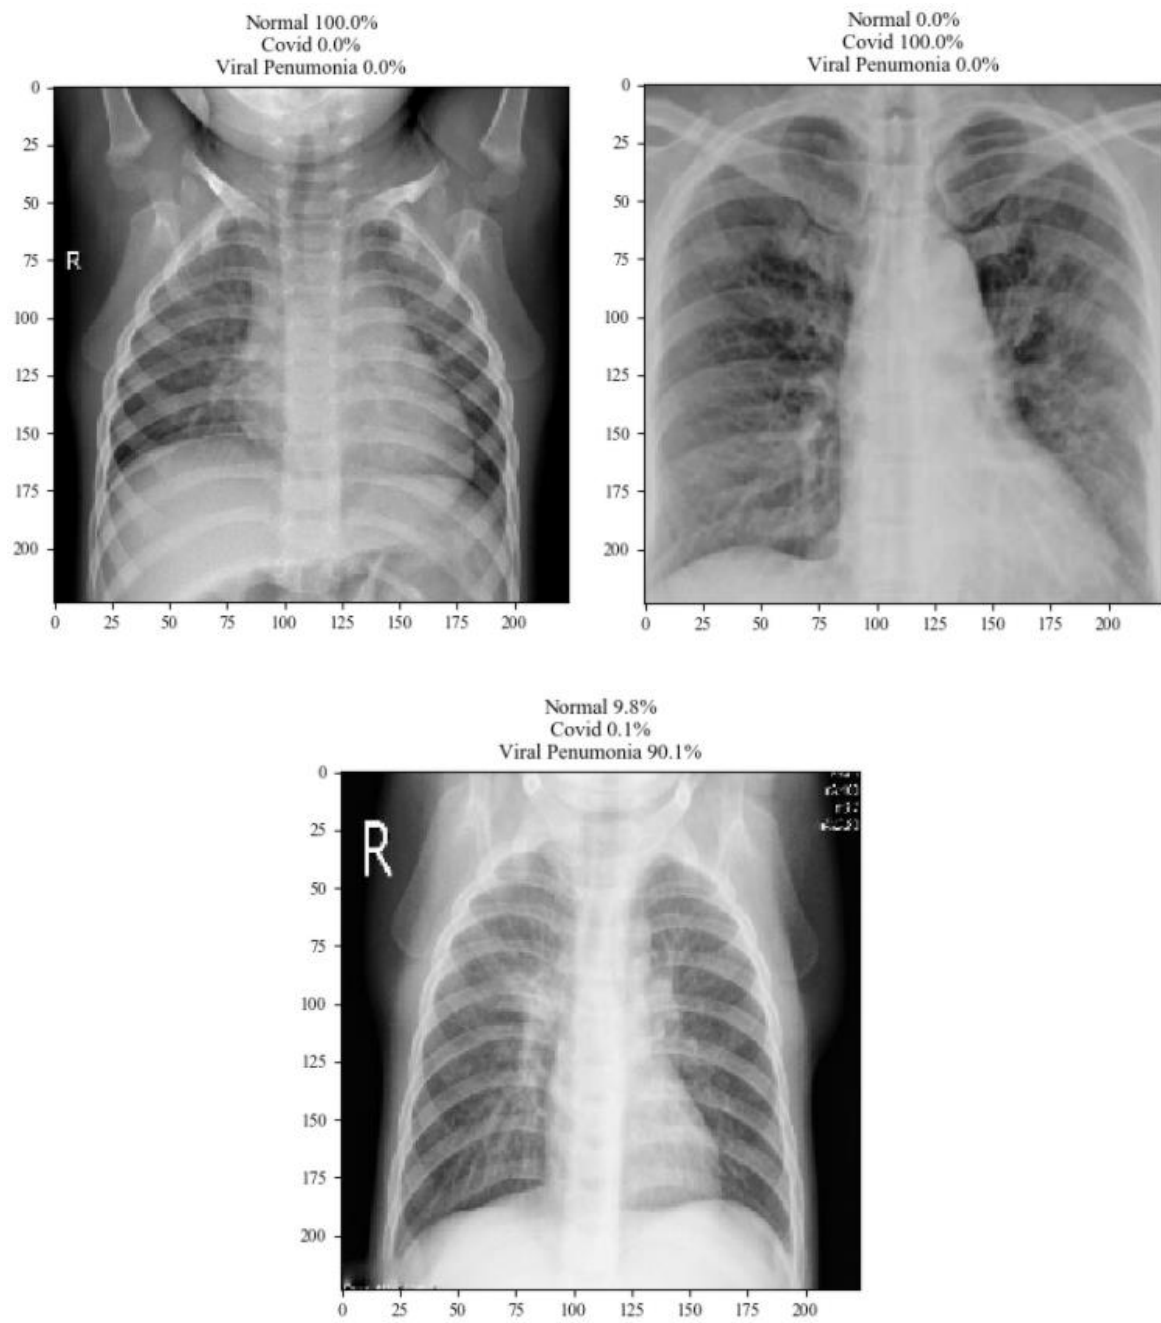

**Figure S1.** Some images evaluated by the ResNet50V2 model for 3-class in the COV-MCNet.

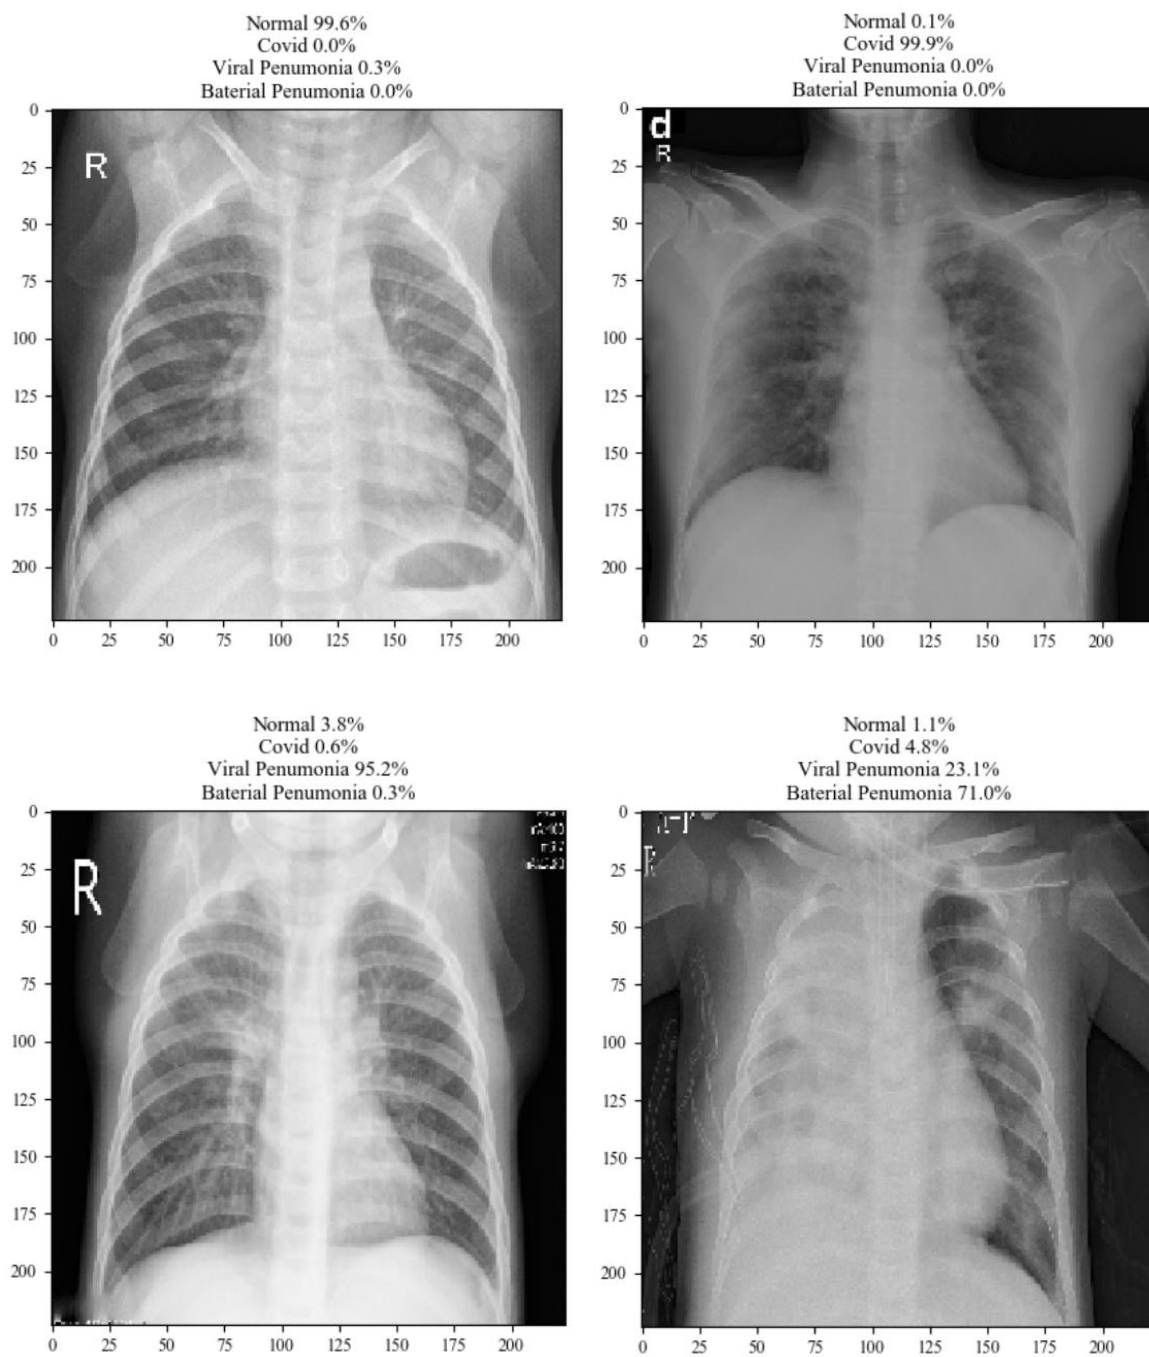

**Figure S2.** Some images evaluated by the DenseNet201 model for 4-class in the COV-MCNet.
